# Supplementary material
Source: Springer Nature journal article supplement (https://www.springermedizin.de/resource/supplementary/12889_2011_4988_MOESM3_ESM.pdf/9492566)

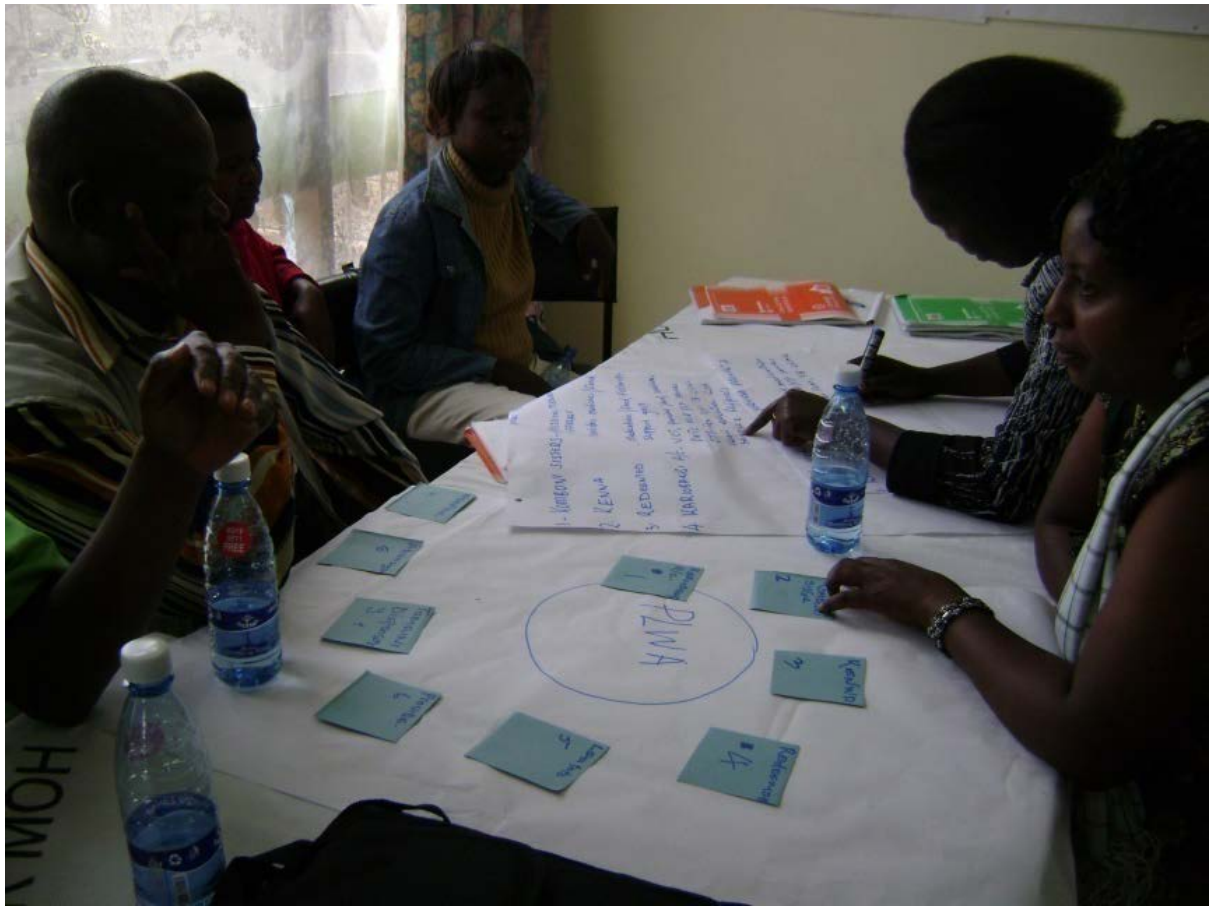

1. ...  
2. ...  
3. ...  
4. ...  
5. ...  
6. ...  
7. ...

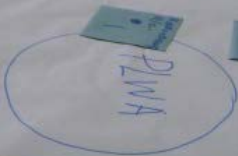

1. ...

2. ...

3. ...

4. ...

5. ...

6. ...

7. ...

HOW A

Supplement: MOESM3 [file 9492566]
